# Supplementary material for: Determination of calcium, iron, and selenium in human serum by isotope dilution analysis using nitrogen microwave inductively coupled atmospheric pressure plasma mass spectrometry (MICAP-MS)
Source: Springer Nature journal article supplement (doi:10.1007/s00216-024-05274-0), 2024-04-08
Supplement: MOESM1 [file 216_2024_5274_MOESM1_ESM.pdf]

## Supporting Information

### Determination of calcium, iron, and selenium in human serum by isotope dilution analysis using nitrogen microwave inductively coupled atmospheric pressure plasma mass spectrometry (MICAP-MS)

Zengchao You\*<sup>1</sup>, Alexander Winckelmann<sup>1,2</sup>, Jochen Vogl<sup>1</sup>, Sebastian Recknagel<sup>1</sup>, Carlos Abad\*<sup>1</sup>

<sup>1</sup>Bundesanstalt für Materialforschung und -prüfung (BAM), Richard-Willstätter-Straße 11, D-12489 Berlin, Germany.

<sup>2</sup>Humboldt-Universität zu Berlin, Brook-Taylor-Straße 2, D-12489 Berlin, Germany.

E-Mail: [Zengchao.You@bam.de](mailto:Zengchao.You@bam.de) and [Carlos.Abad@bam.de](mailto:Carlos.Abad@bam.de)

#### List of Tables

|                                                                                                                                                       |    |
|-------------------------------------------------------------------------------------------------------------------------------------------------------|----|
| 1. Comparison of the certified mass concentrations of the elements in serum samples (bold) with the values determined with external calibration. .... | S1 |
| 2. Masses and mass concentrations of the Ca, Fe, and Se spike solutions used for each serum sample .....                                              | S2 |
| 3. Masses and mass concentrations of the single-element solutions used for reverse ID .....                                                           | S3 |
| 4. Corresponding IS and the calibration levels used for external calibration.....                                                                     | S4 |
| 5. Densities of samples and spike solutions determined through weighing.....                                                                          | S5 |
| 6. LOD and LOQ for matrix-matched external calibration (in 50 mg L <sup>-1</sup> NaCl).....                                                           | S6 |

Table S1: Comparison of the certified mass concentrations of the elements in serum samples (bold) with the values determined with external calibration. Unit for Li, Mg, K, Ca, Fe, Cu, and Zn: mg L<sup>-1</sup>, Unit for Cr, Mn, As, and Se: µg L<sup>-1</sup>. n.d. for not determined. The uncertainty provided with each value is the expanded uncertainty, which was set to be twice the standard deviation.

|                    | <i>Li</i>           | <i>Mg</i>           | <i>K</i>           | <i>Ca</i>           | <i>Fe</i>            | <i>Cu</i>            | <i>Zn</i>          | <i>Cr</i>          | <i>Mn</i>          | <i>As</i>         | <i>Se</i>          |
|--------------------|---------------------|---------------------|--------------------|---------------------|----------------------|----------------------|--------------------|--------------------|--------------------|-------------------|--------------------|
| <i>BCR 304</i>     | <b>5.91 ± 0.174</b> | <b>44.4 ± 0.72</b>  | <i>n.d.</i>        | <b>88.04 ± 0.75</b> | <i>n.d.</i>          | <i>n.d.</i>          | <i>n.d.</i>        | <i>n.d.</i>        | <i>n.d.</i>        | <i>n.d.</i>       | <i>n.d.</i>        |
|                    | 6.83 ± 0.51         | 43.4 ± 2.4          | 226 ± 16           | 89.02 ± 2.02        | 1.5 ± 0.8            | 0.98 ± 0.18          | 10.6 ± 4           | 151 ± 16           | 16.4 ± 2.1         | 298 ± 18          | 5341 ± 190         |
| <i>BCR 637</i>     | <i>n.d.</i>         | <i>n.d.</i>         | <i>n.d.</i>        | <i>n.d.</i>         | <i>n.d.</i>          | <i>n.d.</i>          | <b>1.11 ± 0.22</b> | <i>n.d.</i>        | <i>n.d.</i>        | <i>n.d.</i>       | <b>81 ± 7</b>      |
|                    | 0.01 ± 0.02         | 15.7 ± 3.1          | 124 ± 14           | 49.4 ± 5.2          | 0.56 ± 0.32          | 0.9 ± 0.16           | 2.49 ± 0.62        | 155 ± 16           | 6.1 ± 1.4          | 90 ± 20           | 1232 ± 84          |
| <i>BCR 638</i>     | <i>n.d.</i>         | <i>n.d.</i>         | <i>n.d.</i>        | <i>n.d.</i>         | <i>n.d.</i>          | <i>n.d.</i>          | <b>1.43 ± 0.21</b> | <i>n.d.</i>        | <i>n.d.</i>        | <i>n.d.</i>       | <b>104 ± 7</b>     |
|                    | 0.06 ± 0.02         | 16 ± 2.4            | 120 ± 20           | 69 ± 5              | 1.1 ± 1              | 0.66 ± 0.14          | 2.45 ± 0.48        | 169 ± 18           | 8.4 ± 2            | 90 ± 12           | 1467 ± 90          |
| <i>BCR 639</i>     | <i>n.d.</i>         | <i>n.d.</i>         | <i>n.d.</i>        | <i>n.d.</i>         | <i>n.d.</i>          | <i>n.d.</i>          | <b>2.36 ± 0.14</b> | <i>n.d.</i>        | <i>n.d.</i>        | <i>n.d.</i>       | <b>133 ± 12</b>    |
|                    | 0.05 ± 0.02         | 15.6 ± 2.2          | 115 ± 20           | 56.2 ± 3.6          | 0.95 ± 0.12          | 0.85 ± 0.14          | 3.67 ± 0.31        | 88 ± 14            | 6.2 ± 1.4          | 110 ± 16          | 2279 ± 138         |
| <i>NIST 909C</i>   | <i>n.d.</i>         | <b>21.76 ± 0.16</b> | <b>162.7 ± 2.7</b> | <b>101 ± 1.1</b>    | <b>0.903 ± 0.039</b> | <i>n.d.</i>          | <i>n.d.</i>        | <i>n.d.</i>        | <i>n.d.</i>        | <i>n.d.</i>       | <b>118.7 ± 3.3</b> |
|                    | 0.04 ± 0.02         | 22.14 ± 2.2         | 167 ± 10           | 104.2 ± 4.2         | 0.941 ± 0.08         | 0.83 ± 0.15          | 2.64 ± 0.84        | 65 ± 12            | 7.2 ± 4            | 92 ± 11           | 1552 ± 68          |
| <i>ClinChek 1</i>  | <b>3.76 ± 0.57</b>  | <b>16 ± 1.6</b>     | <i>n.d.</i>        | <i>n.d.</i>         | <b>0.859 ± 0.13</b>  | <b>0.743 ± 0.111</b> | <b>1.22 ± 0.18</b> | <b>1.58 ± 0.4</b>  | <b>2.41 ± 0.6</b>  | <b>9.48 ± 1.9</b> | <b>57.7 ± 11</b>   |
|                    | 3.24 ± 0.41         | 15.4 ± 1.82         | 102 ± 12           | 98 ± 13             | 0.89 ± 0.1           | 0.74 ± 0.11          | 2.61 ± 0.62        | 4.6 ± 1.4          | 1.99 ± 0.33        | 73 ± 16           | 897 ± 59           |
| <i>ClinChek 2</i>  | <b>7.58 ± 1.14</b>  | <b>21.8 ± 2.2</b>   | <i>n.d.</i>        | <i>n.d.</i>         | <b>1.48 ± 0.22</b>   | <b>1.4 ± 0.21</b>    | <b>1.7 ± 0.25</b>  | <b>5.92 ± 1.19</b> | <b>6.24 ± 1.25</b> | <b>19.3 ± 3.9</b> | <b>105 ± 21</b>    |
|                    | 6.74 ± 0.81         | 19.8 ± 2.2          | 101 ± 10           | 79 ± 9              | 1.44 ± 0.08          | 1.28 ± 0.2           | 1.66 ± 0.75        | 12.7 ± 3.1         | 4.8 ± 0.84         | 70 ± 10           | 1172 ± 72          |
| <i>Seronorm L1</i> | <b>5.06 ± 1.02</b>  | <b>19.3 ± 3.9</b>   | <b>148 ± 30</b>    | <b>97 ± 20</b>      | <b>1.4 ± 0.28</b>    | <b>1.12 ± 0.23</b>   | <b>1.46 ± 0.29</b> | <b>1.5 ± 0.3</b>   | <b>9.4 ± 1.8</b>   | <i>n.d.</i>       | <b>95 ± 19</b>     |
|                    | 5.18 ± 0.62         | 18.4 ± 2.1          | 138 ± 12           | 106 ± 5.2           | 1.59 ± 0.22          | 1.08 ± 0.08          | 2.9 ± 0.6          | 5.3 ± 1.52         | 8.12 ± 1.4         | 170 ± 26          | 1296 ± 101         |
| <i>Seronorm L2</i> | <b>10.0 ± 2.0</b>   | <b>35.7 ± 7.2</b>   | <b>235 ± 47</b>    | <b>138 ± 28</b>     | <b>2.07 ± 0.42</b>   | <b>2.18 ± 0.43</b>   | <b>2.09 ± 0.42</b> | <b>3.91 ± 0.79</b> | <b>14.2 ± 2.9</b>  | <i>n.d.</i>       | <b>139 ± 28</b>    |
|                    | 9.32 ± 0.84         | 33.4 ± 4.2          | 210 ± 16           | 136.2 ± 6.1         | 2.22 ± 0.16          | 2.17 ± 0.24          | 3.35 ± 0.7         | 10.6 ± 3.2         | 9 ± 3.2            | 142 ± 28          | 3560 ± 162         |

Table S2: Masses and mass concentrations of the Ca, Fe, and Se spike solutions used for each serum sample. Unit: g. n.d. for not determined.

|                    | <i>Ca (529.25 mg L<sup>-1</sup>)</i> | <i>Fe (11.02 mg L<sup>-1</sup>)</i> | <i>Se (100.78 µg L<sup>-1</sup>)</i> |
|--------------------|--------------------------------------|-------------------------------------|--------------------------------------|
| <i>BCR 304</i>     | <i>0.072</i>                         | <i>n.d.</i>                         | <i>n.d.</i>                          |
| <i>BCR 637</i>     | <i>n.d.</i>                          | <i>n.d.</i>                         | <i>0.3234</i>                        |
| <i>BCR 638</i>     | <i>n.d.</i>                          | <i>n.d.</i>                         | <i>0.4142</i>                        |
| <i>BCR 639</i>     | <i>n.d.</i>                          | <i>n.d.</i>                         | <i>0.5285</i>                        |
| <i>NIST 909C</i>   | <i>0.0818</i>                        | <i>0.0553</i>                       | <i>0.4605</i>                        |
| <i>ClinChek 1</i>  | <i>n.d.</i>                          | <i>0.0547</i>                       | <i>0.4167</i>                        |
| <i>ClinChek 2</i>  | <i>n.d.</i>                          | <i>0.0868</i>                       | <i>4161</i>                          |
| <i>Seronorm L1</i> | <i>0.0799</i>                        | <i>0.0877</i>                       | <i>0.3773</i>                        |
| <i>Seronorm L2</i> | <i>0.1224</i>                        | <i>0.1328</i>                       | <i>0.5561</i>                        |

Table S3: Masses and mass concentrations of the single-element solutions used for reverse ID.

|           | <i>Mass</i>     | <i>Mass concentration</i>       |
|-----------|-----------------|---------------------------------|
| <i>Ca</i> | <i>0.0154 g</i> | <i>100.48 mg L<sup>-1</sup></i> |
| <i>Fe</i> | <i>0.1053 g</i> | <i>10.23 mg L<sup>-1</sup></i>  |
| <i>Se</i> | <i>0.8110 g</i> | <i>100.90 µg L<sup>-1</sup></i> |

Table S4: Corresponding IS and the calibration levels used for external calibration.

|           | <i>Measured m/z</i> | <i>Internal standard</i> | <i>Calibration levels (µg L<sup>-1</sup>)</i> |
|-----------|---------------------|--------------------------|-----------------------------------------------|
| <i>Li</i> | <i>7</i>            | <i><sup>6</sup>Li</i>    | <i>0.1 - 10</i>                               |
| <i>Mg</i> | <i>24</i>           | <i><sup>45</sup>Sc</i>   | <i>10 - 500</i>                               |
| <i>K</i>  | <i>39</i>           | <i><sup>45</sup>Sc</i>   | <i>10 - 500</i>                               |
| <i>Ca</i> | <i>40, 44</i>       | <i><sup>45</sup>Sc</i>   | <i>10 - 500</i>                               |
| <i>Fe</i> | <i>56, 57</i>       | <i><sup>45</sup>Sc</i>   | <i>0.1 - 10</i>                               |
| <i>Cu</i> | <i>63, 65</i>       | <i><sup>45</sup>Sc</i>   | <i>0.1 - 10</i>                               |
| <i>Zn</i> | <i>64, 66</i>       | <i><sup>89</sup>Y</i>    | <i>0.1 - 10</i>                               |
| <i>Cr</i> | <i>52, 53</i>       | <i><sup>89</sup>Y</i>    | <i>0.1 - 10</i>                               |
| <i>Mn</i> | <i>55</i>           | <i><sup>89</sup>Y</i>    | <i>0.1 - 10</i>                               |
| <i>As</i> | <i>75</i>           | <i><sup>89</sup>Y</i>    | <i>0.1 - 10</i>                               |
| <i>Se</i> | <i>78, 80, 82</i>   | <i><sup>89</sup>Y</i>    | <i>0.2 - 40</i>                               |

Table S5: Densities of samples and spike solutions determined through weighing.

|                    | $\rho$ (g mL <sup>-1</sup> ) |
|--------------------|------------------------------|
| <i>BCR 304</i>     | <i>1.0100 ± 0.0050</i>       |
| <i>BCR 637</i>     | <i>1.00833 ± 0.00764</i>     |
| <i>BCR 638</i>     | <i>1.01333 ± 0.00578</i>     |
| <i>BCR 639</i>     | <i>1.01833 ± 0.00764</i>     |
| <i>NIST 909C</i>   | <i>1.02412 ± 0.00009</i>     |
| <i>ClinChek 1</i>  | <i>1.02167 ± 0.00577</i>     |
| <i>ClinChek 2</i>  | <i>1.02000 ± 0.00500</i>     |
| <i>Seronorm L1</i> | <i>1.02333 ± 0.00289</i>     |
| <i>Seronorm L2</i> | <i>1.02167 ± 0.00289</i>     |
| <i>Ca Spike</i>    | <i>1.00333 ± 0.00289</i>     |
| <i>Fe Spike</i>    | <i>1.00500 ± 0.00500</i>     |
| <i>Se Spike</i>    | <i>1.00167 ± 0.00289</i>     |

Table S6: LOD and LOQ for matrix-matched external calibration (in 50 mg L<sup>-1</sup> NaCl).

|           | <i>m/z</i> | <i>LOD</i> (µg L <sup>-1</sup> ) | <i>LOQ</i> (µg L <sup>-1</sup> ) |
|-----------|------------|----------------------------------|----------------------------------|
| <i>Li</i> | <i>7</i>   | <i>0.26</i>                      | <i>0.88</i>                      |
| <i>Mg</i> | <i>24</i>  | <i>1.1</i>                       | <i>3.6</i>                       |
| <i>K</i>  | <i>39</i>  | <i>0.36</i>                      | <i>1.2</i>                       |
| <i>Ca</i> | <i>40</i>  | <i>2.3</i>                       | <i>7.8</i>                       |
| <i>Fe</i> | <i>56</i>  | <i>0.12</i>                      | <i>0.39</i>                      |
| <i>Cu</i> | <i>63</i>  | <i>0.24</i>                      | <i>0.81</i>                      |
| <i>Zn</i> | <i>66</i>  | <i>0.40</i>                      | <i>1.4</i>                       |
| <i>Cr</i> | <i>52</i>  | <i>0.06</i>                      | <i>0.21</i>                      |
| <i>Mn</i> | <i>55</i>  | <i>0.0016</i>                    | <i>0.0053</i>                    |
| <i>As</i> | <i>75</i>  | <i>0.30</i>                      | <i>1.0</i>                       |
| <i>Se</i> | <i>80</i>  | <i>0.70</i>                      | <i>2.4</i>                       |
